# Supplementary material for: Kidney Disease Complexity Manifested: One Biomarker Size Does Not Fit All
Source: PubMed Central journal article supplement — Kidney Int Rep. 2022 Jun 3;7(7):1458–60. doi: 10.1016/j.ekir.2022.05.037 (PMC9263414; doi:10.1016/j.ekir.2022.05.037), 2022-06-03
Supplement: mmc1.pdf [file mmc1.pdf]

## Supplemental material

**Supplemental Table 1: Biomarkers of chronic kidney disease (CKD)**

| Biomarker                              | Description                                                      | Function                                                                                                       | Clinical significance                                                                                                                                                                                                    | Reference                                                                                                                                                                                                                                                                                                                                                                                                                                                                                                                                                 |
|----------------------------------------|------------------------------------------------------------------|----------------------------------------------------------------------------------------------------------------|--------------------------------------------------------------------------------------------------------------------------------------------------------------------------------------------------------------------------|-----------------------------------------------------------------------------------------------------------------------------------------------------------------------------------------------------------------------------------------------------------------------------------------------------------------------------------------------------------------------------------------------------------------------------------------------------------------------------------------------------------------------------------------------------------|
| <b>Biomarkers of glomerular injury</b> |                                                                  |                                                                                                                |                                                                                                                                                                                                                          |                                                                                                                                                                                                                                                                                                                                                                                                                                                                                                                                                           |
| Nephrin                                | 180 kD transmembrane protein expressed in glomerular podocytes   | Maintains glomerular filtration                                                                                | Biomarkers of podocytopathies, diabetic nephropathy.<br><br>Levels progressively increase with increasing albuminuria.                                                                                                   | 1.Akankwasa, G.; Jianhua, L.; Guixue, C.; Changjuan, A.; Xiaosong, Q. Urine markers of podocyte dysfunction: A review of podocalyxin and nephrin in selected glomerular diseases. <i>Biomark. Med.</i> 2018, 12, 927–935.<br>2.Surya, M.; Rajappa, M.; Vadivelan, M. Utility of Urinary Nephrin in Patients with and Without Diabetic Nephropathy and Its Correlation with Albuminuria. <i>Cureus</i> 2021, 13, e20102                                                                                                                                    |
| Dendrin                                | Component of slit diaphragm complex                              | During cell injury, relocates from the membrane to the nucleus and induces apoptosis                           | It is increased in podocytopathies.<br><br>The number of glomeruli with the absence of dendrin correlated inversely with creatinine clearance.                                                                           | 1.Asanuma, K.; Campbell, K.N.; Kim, K.; Faul, C.; Mundel, P. Nuclear relocation of the nephrin and CD2AP-binding protein dendrin promotes apoptosis of podocytes. <i>Proc. Natl. Acad. Sci. USA</i> 2007, 104, 10134–10139.<br>2.Mizdrak M, Vukojević K, Filipović N, Čapkun V, Benzon B, Durdov MG. Expression of DENDRIN in several glomerular diseases and correlation to pathological parameters and renal failure - preliminary study. <i>Diagn Pathol.</i> 2018 Nov 20;13(1):90. doi: 10.1186/s13000-018-0767-z. PMID: 30458823; PMCID: PMC6247684. |
| Podocin                                | 43 kDa membrane-associated protein in glomerular slit diaphragm. | Plays an important role in nephrin-mediated cellular signaling and maintaining podocyte structure and function | Levels are increased in rapidly progressive kidney disease characterized by nephrotic syndrome and mesangiosclerosis, glomerulosclerosis, and tubulointerstitial fibrosis. It is predictive of severe glomerular injury. | Mollet, G.; Ratelade, J.; Boyer, O.; Onetti Muda, A.; Morisset, L.; Aguirre Lavin, T.; Kitzis, D.; Dallman, M.J.; Bugeon, L.; Hubner, N.; et al. Podocin inactivation in mature kidneys causes focal segmental glomerulosclerosis and nephrotic syndrome. <i>J. Am. Soc. Nephrol.</i> 2009, 20, 2181–2189                                                                                                                                                                                                                                                 |
| Podocalyxin                            | It is an                                                         | Maintains                                                                                                      | Levels are elevated in                                                                                                                                                                                                   | Asao, R.; Asanuma, K.; Kodama, F.; Akiba-Takagi, M.; Nagai-Hosoe, Y.;                                                                                                                                                                                                                                                                                                                                                                                                                                                                                     |

|                                                |                                                                                      |                                                                                                           |                                                                                                                    |                                                                                                                                                                                                                                                                                  |
|------------------------------------------------|--------------------------------------------------------------------------------------|-----------------------------------------------------------------------------------------------------------|--------------------------------------------------------------------------------------------------------------------|----------------------------------------------------------------------------------------------------------------------------------------------------------------------------------------------------------------------------------------------------------------------------------|
| n                                              | anionic transmembrane sialoglycoprotein, and a component of the slit diaphragm       | integrity of kidney filtration barrier                                                                    | obesity-related kidney disease, lupus nephritis. Levels are associated with the proportion of segmental sclerosis. | Seki, T.; Takeda, Y.; Ohsawa, I.; Mano, S.; Matsuoka, K.; et al. Relationships between levels of urinary podocalyxin, number of urinary podocytes, and histologic injury in adult patients with IgA nephropathy. Clin. J. Am. Soc. Nephrol. 2012, 7, 1385–1393                   |
| Immunoglobulin G                               | 150 kDa globular circulating protein                                                 | Important component of humoral immunity                                                                   | Biomarker of mechanical injury to glomerular filtration barrier.                                                   | Hou, J.; Cheng, Y.; Hou, Y.; Wu, H. Lower Serum and Higher Urine Immunoglobulin G Are Associated with an Increased Severity of Idiopathic Membranous Nephropathy. Ann. Clin. Lab. Sci. 2019, 49, 777–784.                                                                        |
| c-Myb                                          | DNA-binding transcription factor                                                     | c-Myb regulates slug protein which plays an important role in epithelial to mesenchyme transition.        | Increased in IgA nephropathy and IgA vasculitis. Marker of fibrosis.                                               | Mizdrak, M.; Filipovic, N.; Vukojevic, K.; C' apkun, V.; Mizdrak, I.; Durdov, M.G. Prognostic value of connective tissue growth factor and c-Myb expression in IgA nephropathy and Henoch-Schönlein purpura-A pilot immunohistochemical study. Acta Histochem. 2020, 122, 151479 |
| <b>Biomarkers of tubular injury</b>            |                                                                                      |                                                                                                           |                                                                                                                    |                                                                                                                                                                                                                                                                                  |
| Vanin-1 (Vascular non-inflammatory molecule-1) | It is a glycosylphosphatidylinositol anchored ectoenzyme with pantetheinase activity | Plays an important role in the recycling of pantothenic acid and synthesis of coenzyme A                  | Levels increased in hypertensive CKD                                                                               | Bartucci, R.; Salvati, A.; Olinga, P.; Boersma, Y.L. Vanin 1: Its Physiological Function and Role in Diseases. Int. J. Mol. Sci. 2019, 20, 3891.                                                                                                                                 |
| Galectin-3                                     | 32–35 kDa member of the galectin family of -galactoside-binding lectins              | Plays an important role in cell growth, and apoptosis, angiogenesis, inflammation, immunity, and fibrosis | Levels increased in Type2 diabetes mellitus with macroalbuminuria and CKD stage 4 and 5.                           | Hussain, S.; Habib, A.; Hussain, M.S.; Najmi, A.K. Potential biomarkers for early detection of diabetic kidney disease. Diabetes Res. Clin. Pract. 2020, 161, 108082                                                                                                             |
| Uromodulin (Tamm–Horsfall protein)             | It is a glycoprotein produced in the thick                                           | Its production is reduced in interstitial fibrosis and                                                    | Biomarker for intact renal mass and early stages of CKD.                                                           | Steußl D, Block M, Herbst V, Nockher WA, Schlumberger W, Satanovskij R, et al. Plasma Uromodulin Correlates With Kidney                                                                                                                                                          |

|                                                   |                                                                                           |                                                          |                                                                                                                             |                                                                                                                                                                                                                                                                       |
|---------------------------------------------------|-------------------------------------------------------------------------------------------|----------------------------------------------------------|-----------------------------------------------------------------------------------------------------------------------------|-----------------------------------------------------------------------------------------------------------------------------------------------------------------------------------------------------------------------------------------------------------------------|
|                                                   | ascending limb and early distal tubule.                                                   | tubular atrophy                                          |                                                                                                                             | Function and Identifies Early Stages in Chronic Kidney Disease Patients. <i>Medicine (Baltimore)</i> . 2016 Mar. 95 (10):e3011.                                                                                                                                       |
| <b>Other biomarkers of chronic kidney disease</b> |                                                                                           |                                                          |                                                                                                                             |                                                                                                                                                                                                                                                                       |
| Asymmetric dimethyl arginine                      | It is an endogenously produced methylated arginine that reversibly inhibits nitric oxide. | In huge quantities, it inhibits NO and induces fibrosis. | Relevant biomarker for CKD. A significant predictor of cardiovascular morbidity and mortality in CKD and dialysis patients. | Hanai K, Babazono T, Nyumura I, Toya K, Tanaka N, Tanaka M, et al. Asymmetric dimethylarginine is closely associated with the development and progression of nephropathy in patients with type 2 diabetes. <i>Nephrol Dial Transplant</i> . 2009 Jun. 24(6):1884-8.   |
| Beta trace protein                                | lipocalin-type prostaglandin D2 synthase                                                  | Tubular proteinuria                                      | Biomarker for progression of hypertensive CKD in African Americans                                                          | Bhavsar NA, Appel LJ, Kusek JW, Contreras G, Bakris G, Coresh J, et al. Comparison of measured GFR, serum creatinine, cystatin C, and beta-trace protein to predict ESRD in African Americans with hypertensive CKD. <i>Am J Kidney Dis</i> . 2011 Dec. 58(6):886-93. |
|                                                   |                                                                                           |                                                          |                                                                                                                             |                                                                                                                                                                                                                                                                       |

## SUPPLEMENTARY REFERENCES

- S1. Lisowska-Myjak B. Serum and urinary biomarkers of acute kidney injury. *Blood Purif.* 2010;29(4):357-65. doi: 10.1159/000309421. Epub 2010 Apr 14. PMID: 20389065.
- S2. Herget-Rosenthal S, Poppen D, Hüsing J, Marggraf G, Pietruck F, Jakob HG, Philipp T, Kribben A: Prognostic value of tubular proteinuria and enzymuria in nonoliguric acute tubular necrosis. *Clin Chem* 2004;50:552– 558
- S3. Albert C, Zapf A, Haase M et al. Neutrophil Gelatinase-Associated Lipocalin Measured on Clinical Laboratory Platforms for the Prediction of Acute Kidney Injury and the Associated Need for Dialysis Therapy: A Systematic Review and Meta-analysis. *Am J Kidney Dis.* 2020 Dec. 766:826–841.e1.
- S4. Ghatanatti R, Teli A, Tirkey SS, Bhattacharya S, Sengupta G, Mondal A. Role of renal biomarkers as predictors of acute kidney injury in cardiac surgery. *Asian Cardiovasc Thorac Ann.* 2014 Feb. 222:234-41.
- S5. Parikh CR, Jani A, Melnikov VY, Faubel S, Edelstein CL. Urinary interleukin-18 is a marker of human acute tubular necrosis. *Am J Kidney Dis.* 2004 Mar. 43(3):405-14
- S6. Yamamoto T, Noiri E, Ono Y, Doi K, Negishi K, Kamijo A, et al. Renal L-type fatty acid-binding protein in acute ischemic injury. *J Am Soc Nephrol.* 2007 Nov. 18(11):2894-902
- S7. Chen C, Yang X, Lei Y, Zha Y, Liu H, Ma C, et al. Urinary Biomarkers at the Time of AKI Diagnosis as Predictors of Progression of AKI among Patients with Acute Cardiorenal Syndrome. *Clin J Am Soc Nephrol.* 2016 Sep 7.11 9:1536-44
- S8. Chen JJ, Fan PC, Kou G, Chang SW, Chen YT, Lee CC, et al. Meta-Analysis: Urinary Calprotectin for Discrimination of Intrinsic and Prerenal Acute Kidney Injury. *J Clin Med.* 2019 Jan 10.81
- S9. Timi and IGF - Kashani K, Al-Khafaji A, Ardiles T, Artigas A, Bagshaw SM, et al. Discovery and validation of cell cycle arrest biomarkers in human acute kidney injury. *Crit Care.* 2013 Feb 6.17 1:R25.
- S10. Chawla LS, Eggers PW, Star RA, et al. Acute kidney injury and chronic kidney disease as interconnected syndromes. *N Engl J Med* 2014; 371: 58-66.
- S11. Rifkin DE, Coca SG, Kalantar-Zadeh K. Does AKI truly lead to CKD? *J Am Soc Nephrol* 2012; 23: 979-984.
- S12. Silver SA, Goldstein SL, Harel Z, et al. Ambulatory care after acute kidney injury: an opportunity to improve patient outcomes. *Canadian journal of kidney health and disease* 2015;2: 36.
- S13. Harel Z, Wald R, Bargman JM, et al. Nephrologist follow-up improves all-cause mortality of severe acute kidney injury survivors. *Kidney Int* 2013; 83: 901-908.
- S14. Srivastava A, Cai X, Mehta R, et al. Hospitalization Trajectories and Risks of ESKD and Death in Individuals With CKD. *Kidney Int Rep* 2021; 6: 1592-1602.
- S15. Cooper DS, Claes D, Goldstein SL, et al. Follow-Up Renal Assessment of Injury Long-Term After Acute Kidney Injury (FRAIL-AKI). *Clin J Am Soc Nephrol* 2016; 11: 21-29.
